# Supplementary material for: Direct chemoselective reduction of plant oils using silane catalysed by Rh(iii) complexes at ambient temperature
Source: Royal Society of Chemistry journal article supplement (doi:10.1039/d3su00481c), 2024-01-01
Supplement: d3su00481c1.pdf [file d3su00481c1.pdf]

Supporting Information for:

## Direct Chemoselective Reduction of Plant Oils using Silane Catalysed by Rh(III) Complex at Ambient Temperature

Unai Prieto-Pascual,<sup>a</sup> Itxaso Bustos,<sup>a</sup> Zoraida Freixa,<sup>ab\*</sup> Amit Kumar<sup>c\*</sup> and Miguel A. Huertos<sup>ab\*</sup>

a) Facultad de Química, Universidad del País Vasco (UPV/EHU), 20018 San Sebastián, SPAIN.

b) IKERBASQUE. Basque Foundation for Science, 48013, Bilbao, SPAIN.

c) School of Chemistry, University of St. Andrews, KY169ST, U. K.

|                                                                                                                                        |      |
|----------------------------------------------------------------------------------------------------------------------------------------|------|
| 1. General procedures                                                                                                                  | S-2  |
| 2. Reaction of 1-octene and cis-2-octene with Et <sub>3</sub> SiH and Ph <sub>2</sub> SiH <sub>2</sub> using [Rh(SiSiBu)] as catalyst. | S-3  |
| 3. Reaction of ethyl acetate with Et <sub>3</sub> SiH and Ph <sub>2</sub> SiH <sub>2</sub> using [Rh(SiSiBu)] as catalyst.             | S-7  |
| 4. Reaction of methyl 5-hexenoate with Et <sub>3</sub> SiH and Ph <sub>2</sub> SiH <sub>2</sub> using [Rh(SiSiBu)] as catalyst.        | S-9  |
| 5. Reaction of ethyl oleate with Ph <sub>2</sub> SiH <sub>2</sub> using [Rh(SiSiBu)] as catalyst.                                      | S-11 |
| 6. Reaction of olive oil with Ph <sub>2</sub> SiH <sub>2</sub> using [Rh(SiSiBu)] as catalyst.                                         | S-13 |
| 7. Reaction of other plant oils with Ph <sub>2</sub> SiH <sub>2</sub> using [Rh(SiSiBu)] as catalyst.                                  | S-16 |
| 8. References                                                                                                                          | S-20 |

## 1. General Procedures

All manipulations, unless otherwise stated, were performed under an atmosphere of nitrogen, using standard Schlenk techniques. Glassware was oven dried at 110°C overnight and flamed under vacuum prior to use. Dry and oxygen free solvents were employed.

**[Rh(SiSiBu)]:** The precatalyst used,  $\{\text{Rh}(\text{H})[\text{SiMe}_2(\text{o-C}_6\text{H}_4\text{Si}^i\text{Bu})](\text{PPh}_3)_2\}[\text{BAR}^{\text{F}_4}]$  (**[Rh(SiSiBu)]**) was prepared as previously reported.<sup>1</sup>

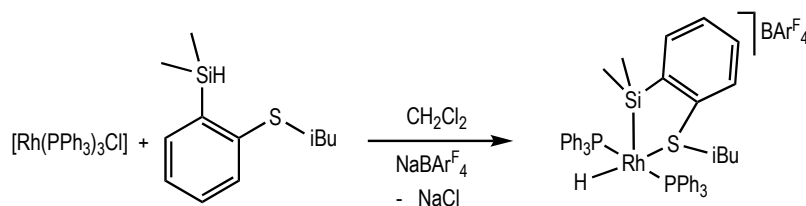

**Scheme S.1.** Synthesis of the precatalysts **[Rh(SiSiBu)]**

**Substrates:** The substrates used in the catalytic reactions were purchased from the commercial companies below and used without any pre-treatment:

- Triethylsilane: Merck
- Diphenylsilane: Merck
- 1-octene: Merck
- Cis-2-octene: Merck
- 5-hexenylacetate: Merck
- Ethyl oleate: Merck
- Olive oil: Tesco Supermarket
- Coconut oil: Tesco Supermarket
- Castor oil: Tesco Supermarket
- Sesame oil: Tesco Supermarket
- Sunflower oil: Tesco Supermarket

**NMR:** NMR spectra were recorded on Bruker Advance DPX 300 MHz spectrometer.  $^1\text{H}$  NMR spectra were referenced to the residual solvent signals. Chemical shifts are quoted in ppm and coupling constants in Hz.

**GC-MS:** Samples for GC-MS measurements were prepared in HPLC grade DCM and the measurements were conducted on an Agilent 8860 GC system coupled to an Agilent 5977B EI instrument.

**Catalytic Experiments:** All catalytic experiments were carried under an inert atmosphere, at room temperature, using 0.5 mol% catalyst in neat. After the reaction time, the corresponding amount of internal standard was added and the composition of the reaction mixture was analyzed by  $^1\text{H}$  NMR in  $\text{CDCl}_3$ .

Internal standard: 1,2-dichloroethane (0.25 equivalents) in the case of reactions performed using octenes, ethyl acetate, methyl 5-hexenoate and ethyl oleate.

1,1,2,2-tetrachloroethane (0.5 equivalents by fatty ester chain) in the case of reaction performed using plant oils.

Calculation of yield: Yields were calculated by integrating one of the signals of the product formed except the case of the reaction of octenes, which were calculated by integrating the remaining triethylsilane Si-H signals.

## 2. Hydrosilylation of 1-octene and cis-2-octene with different silanes using $[\text{Rh}(\text{SiSi}^i\text{Bu})]$ as catalyst.

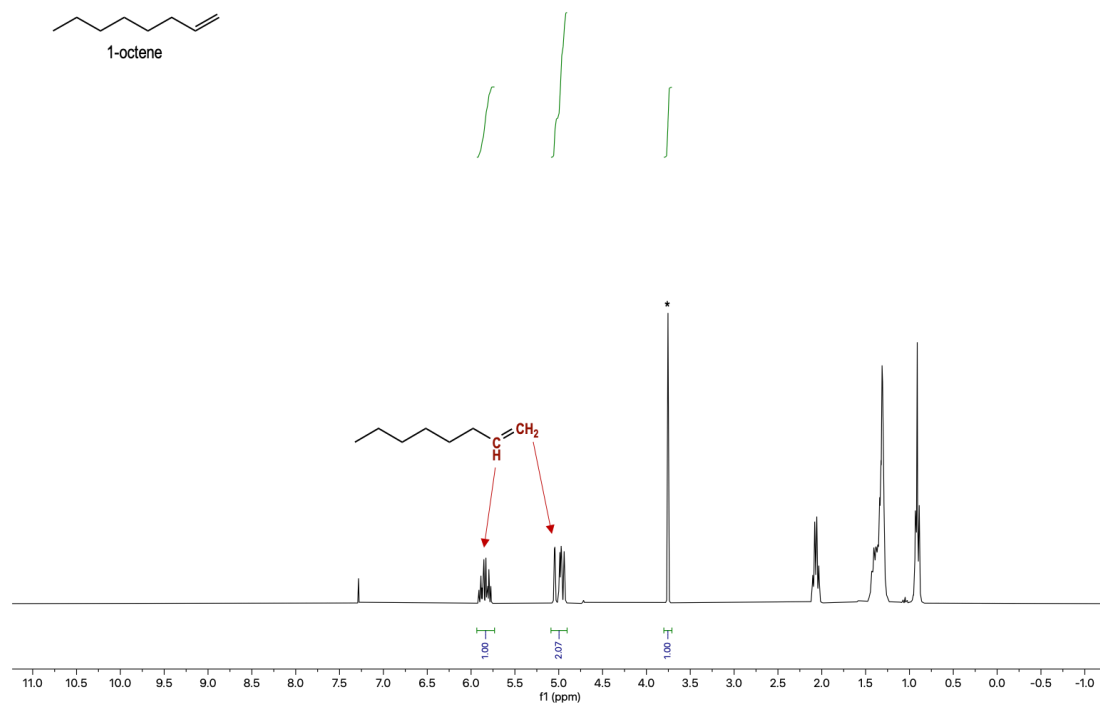

Figure S.1.  $^1\text{H}$  NMR ( $\text{CDCl}_3$ , 298 K) spectrum of 1-octene. (\*) 1,2-dichloroethane (0.25 equivalents) as internal standard.

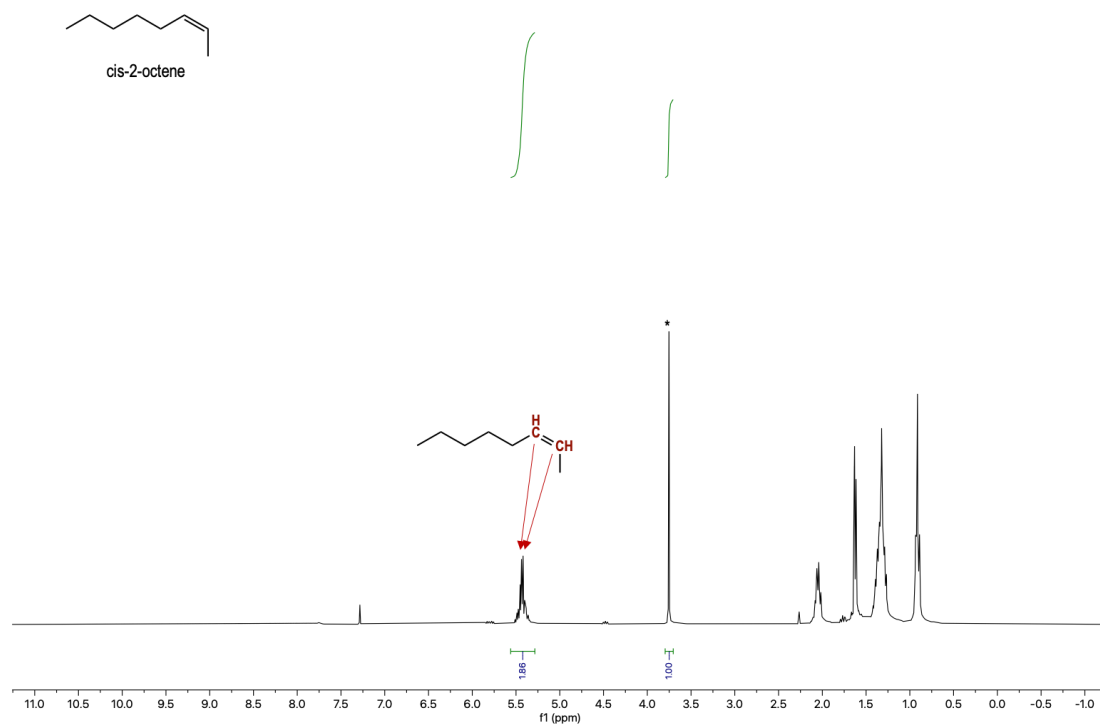

Figure S.2.  $^1\text{H}$  NMR ( $\text{CDCl}_3$ , 298 K) spectrum of cis-2-octene. (\*) 1,2-dichloroethane (0.25 equivalents) as internal standard.

### Hydrosilylation of 1-octene using Et<sub>3</sub>SiH (Table 1, entry 1)

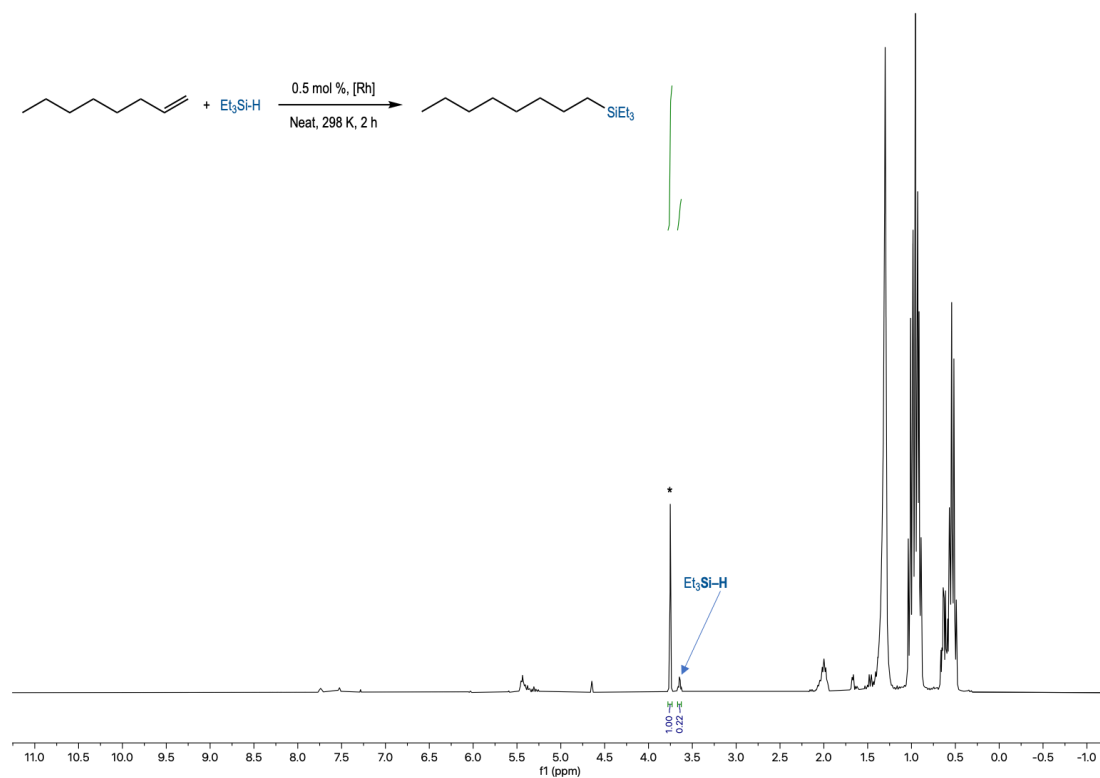

**Figure S.3.** <sup>1</sup>H NMR (CDCl<sub>3</sub>, 298 K) spectrum of the crude reaction mixture after 2 hours. (\*) 1,2-dichloroethane (0.25 equivalents) as internal standard.

### Hydrosilylation of cis-2-octene using Et<sub>3</sub>SiH (Table 1, entry 2). From reference 1.

up186.60.fid

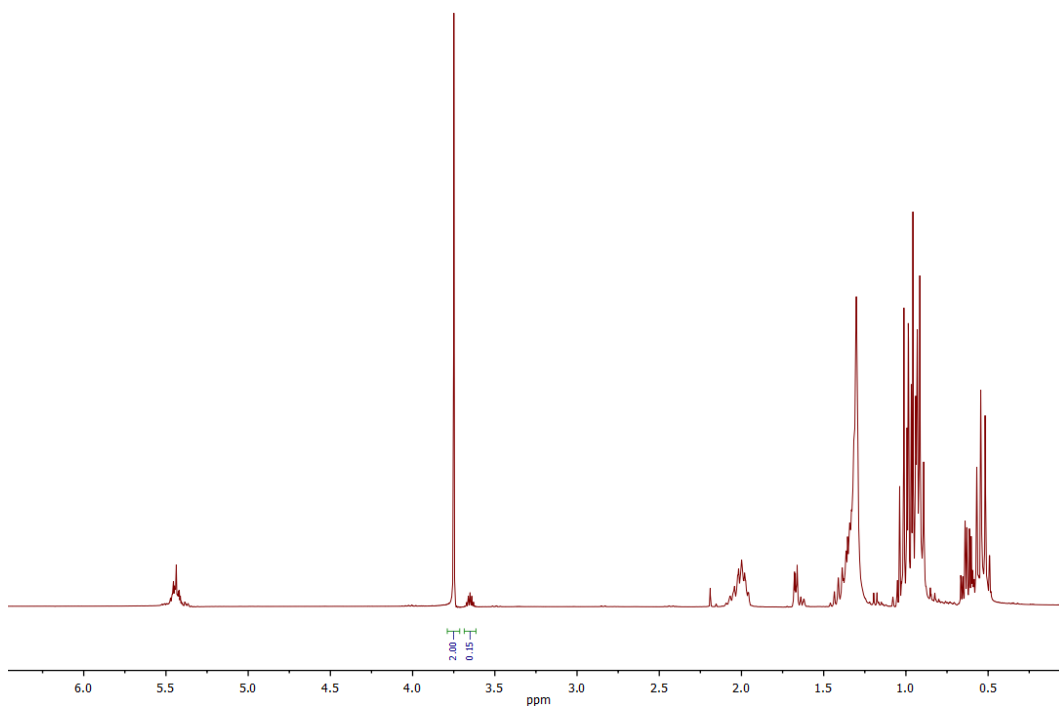

**Figure S.4.** <sup>1</sup>H NMR (CDCl<sub>3</sub>, 298 K) spectrum of the crude reaction mixture after 2 hours. (\*) 1,2-dichloroethane (0.5 equivalents) as internal standard.

### Hydrosilylation of 1-octene using $\text{Ph}_3\text{SiH}$ (Table 1, entry 3)

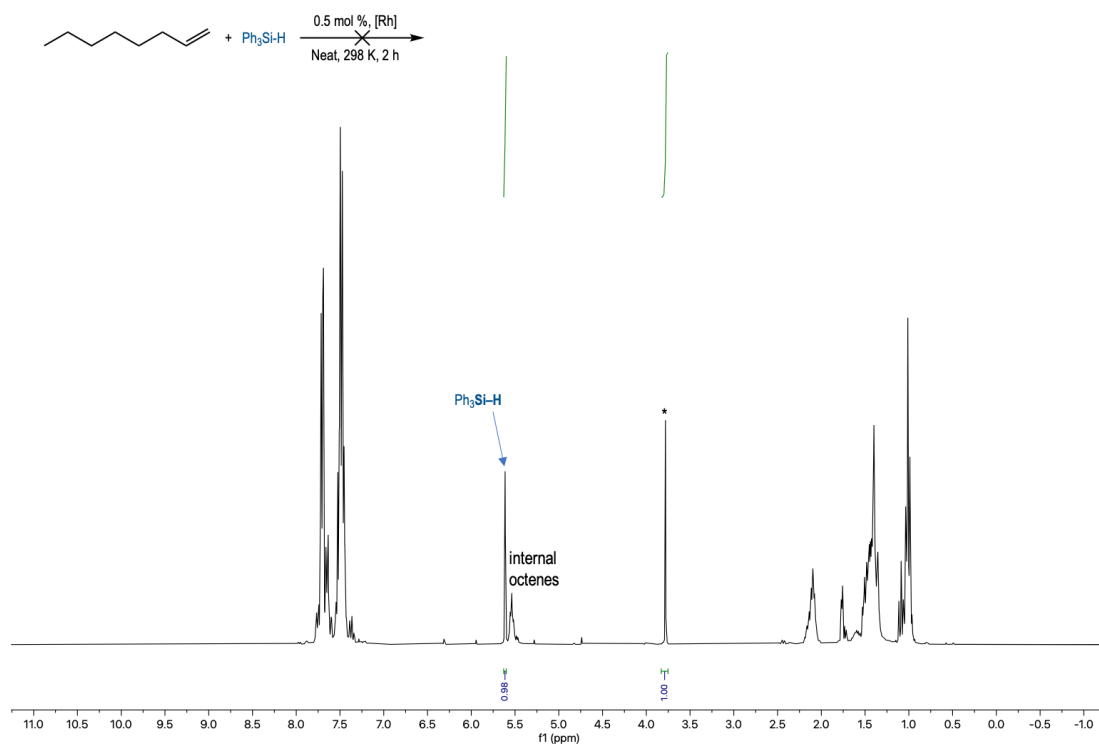

**Figure S.5.**  $^1\text{H}$  NMR ( $\text{CDCl}_3$ , 298 K) spectrum of the crude reaction mixture after 2 hours. (\*) 1,2-dichloroethane (0.25 equivalents) as internal standard.

### Hydrosilylation of *cis*-2-octene using $\text{Ph}_3\text{SiH}$ (Table 1, entry 4)

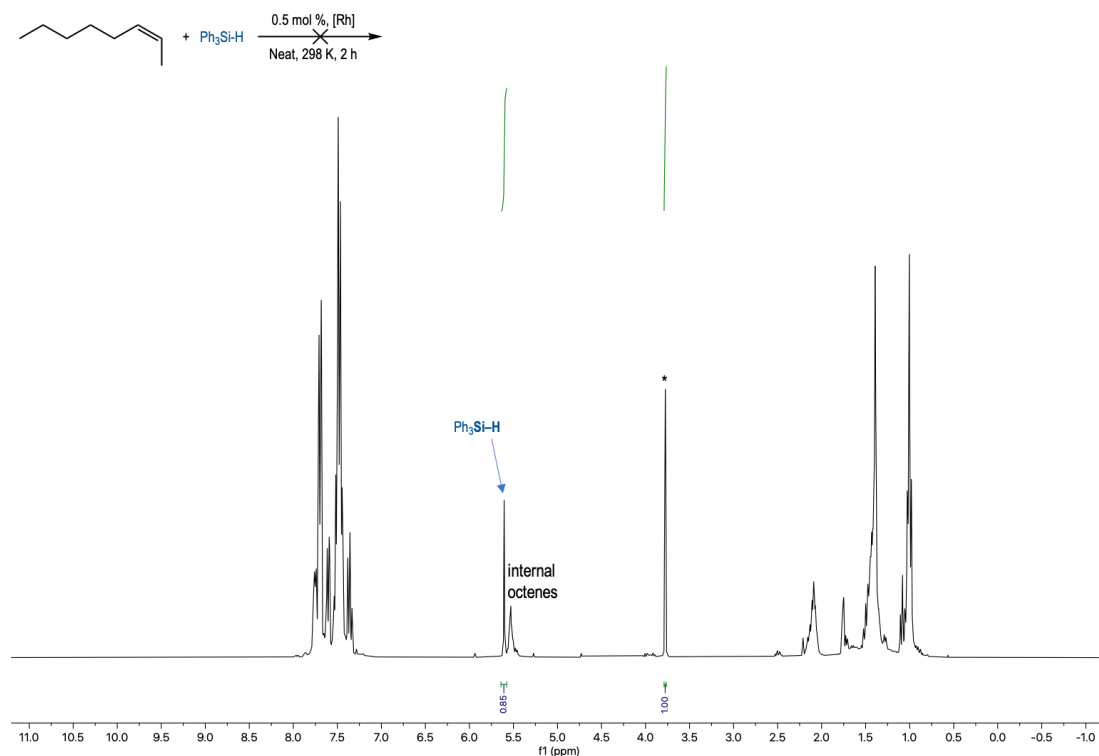

**Figure S.6.**  $^1\text{H}$  NMR ( $\text{CDCl}_3$ , 298 K) spectrum of the crude reaction mixture after 2 hours. (\*) 1,2-dichloroethane (0.25 equivalents) as internal standard.

### Hydrosilylation of 1-octene using $\text{Ph}_2\text{SiH}_2$ (Table 1, entry 5)

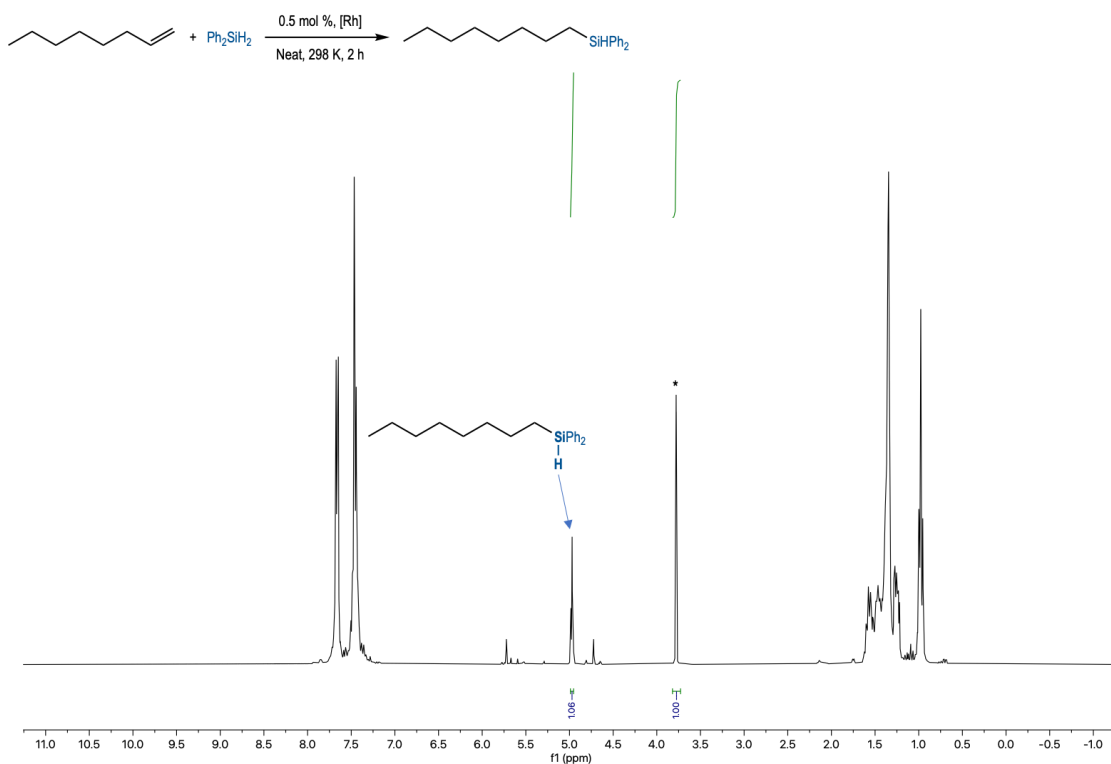

**Figure S.7.**  $^1\text{H}$  NMR ( $\text{CDCl}_3$ , 298 K) spectrum of the crude reaction mixture after 2 hours. (\*) 1,2-dichloroethane (0.25 equivalents) as internal standard.

### Hydrosilylation of *cis*-2-octene using $\text{Ph}_2\text{SiH}_2$ (Table 1, entry 6)

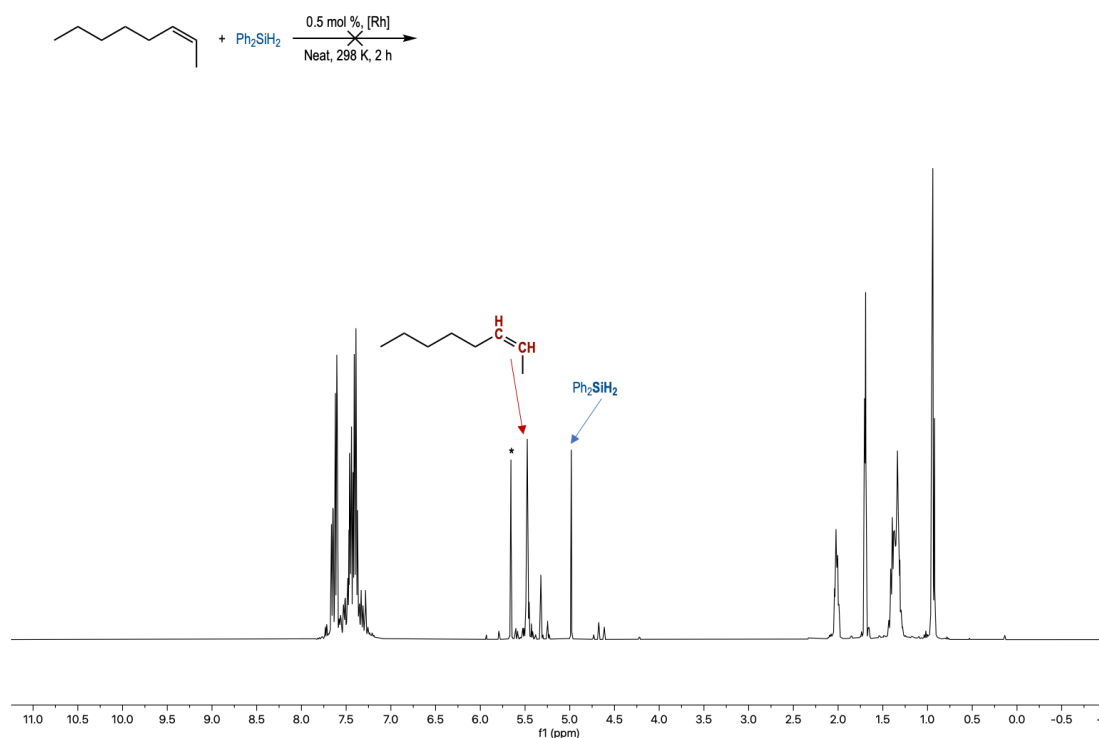

**Figure S.8.**  $^1\text{H}$  NMR ( $\text{CDCl}_3$ , 298 K) spectrum of the crude reaction mixture after 2 hours. (\*) Siloxanes formed by reaction of some remaining diphenylsilane with water.

### 3. Reaction of ethyl acetate with $\text{Et}_3\text{SiH}$ , $\text{Ph}_3\text{SiH}$ and $\text{Ph}_2\text{SiH}_2$ using $[\text{Rh}(\text{SiSiBu})]$ as catalyst.

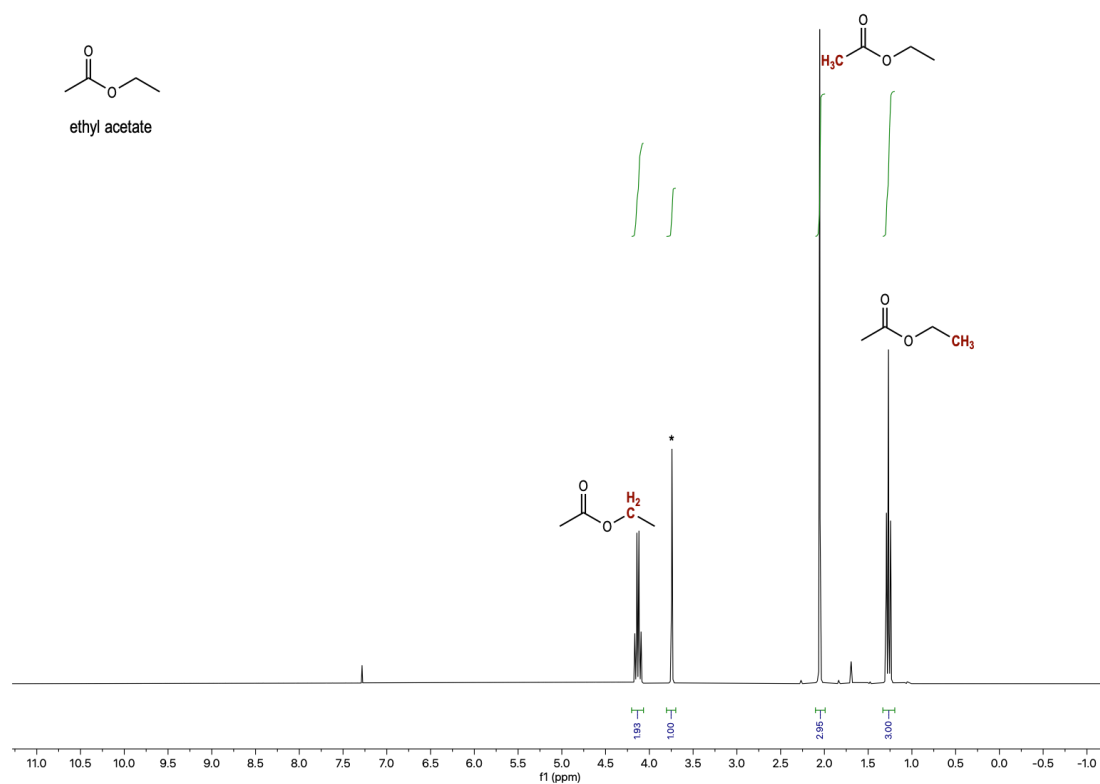

**Figure S.9.**  $^1\text{H}$  NMR ( $\text{CDCl}_3$ , 298 K) spectrum of ethyl acetate. (\*) 1,2-dichloroethane (0.25 equivalents) as internal standard.

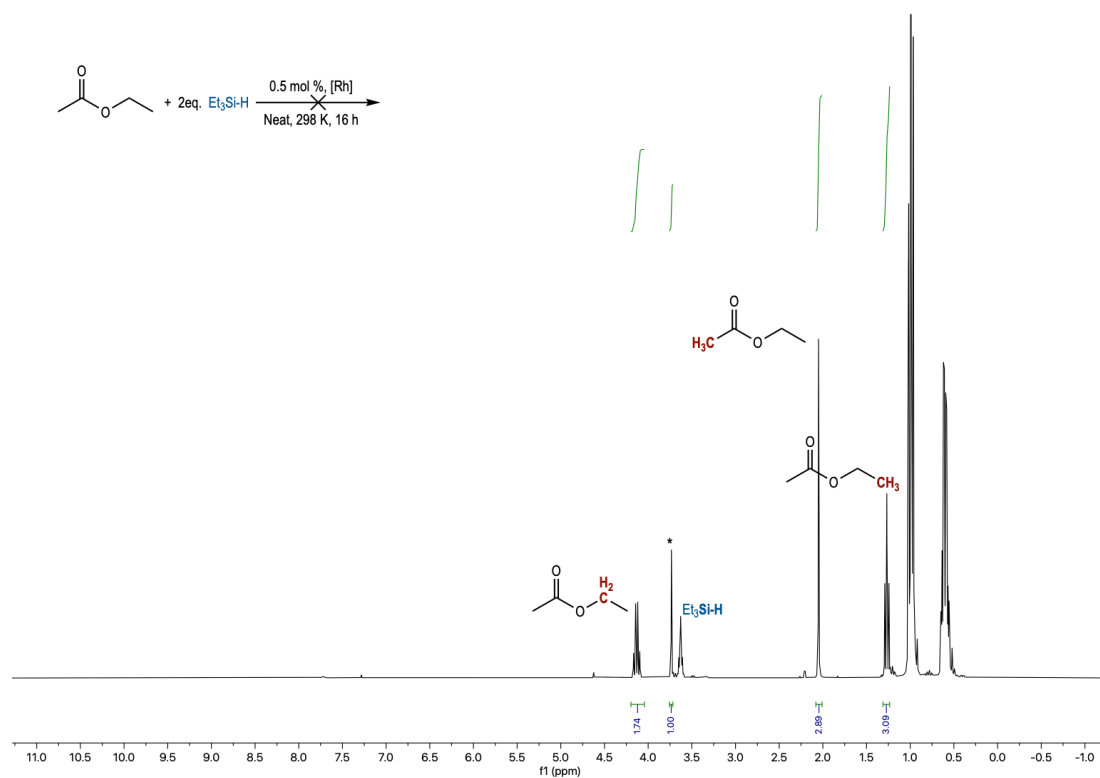

**Figure S.10.**  $^1\text{H}$  NMR ( $\text{CDCl}_3$ , 298 K) spectrum of the crude reaction mixture after 16 hours. (\*) 1,2-dichloroethane (0.25 equivalents) as internal standard.

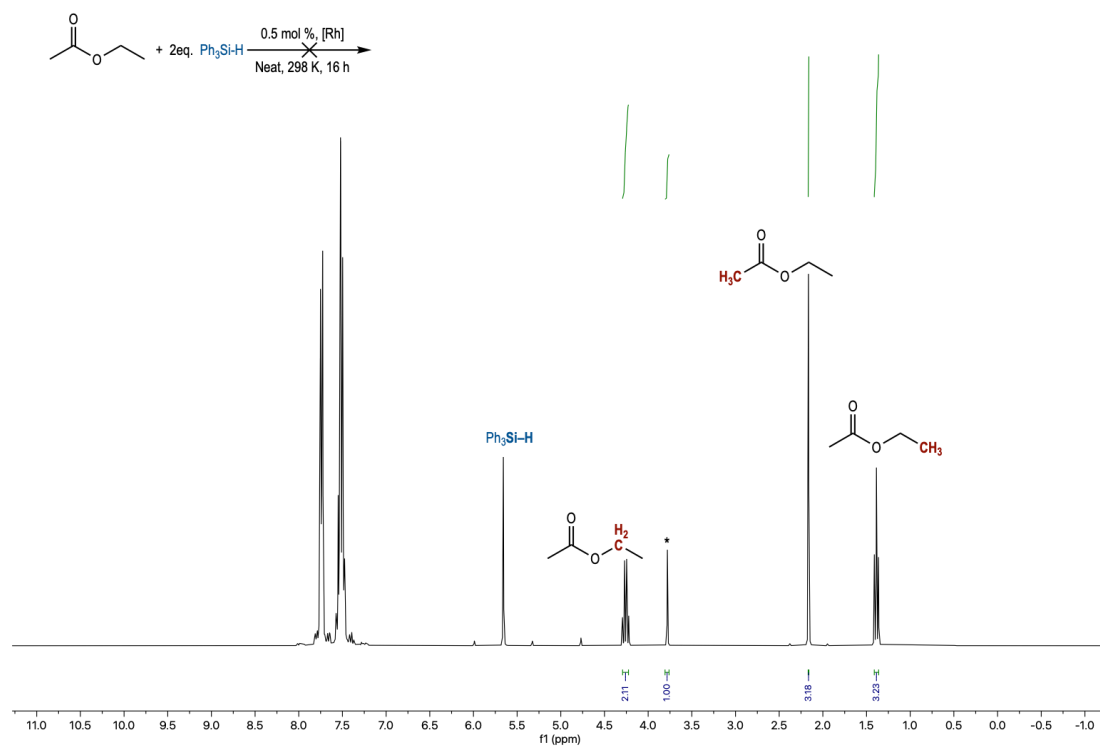

**Figure S.11.**  $^1\text{H NMR}$  (CDCl<sub>3</sub>, 298 K) spectrum of the crude reaction mixture after 16 hours. (\*) 1,2-dichloroethane (0.25 equivalents) as internal standard.

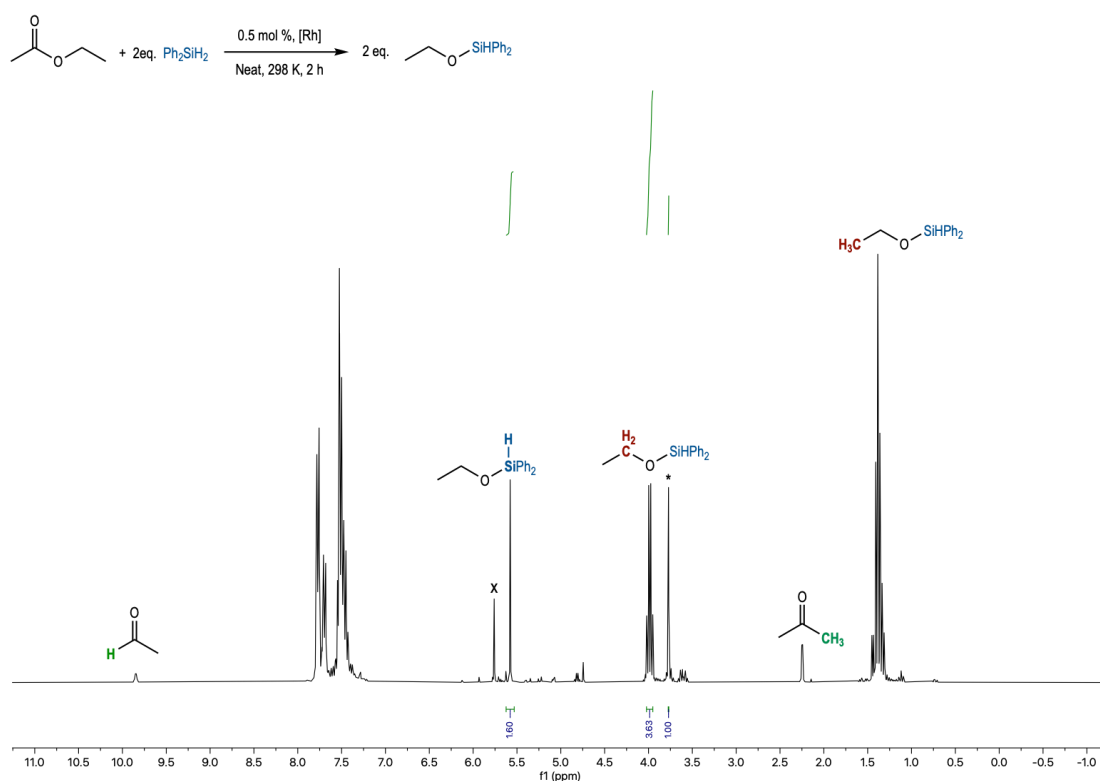

**Figure S.12.**  $^1\text{H NMR}$  (CDCl<sub>3</sub>, 298 K) spectrum of the crude reaction mixture after 16 hours. (\*) 1,2-dichloroethane (0.25 equivalents) as internal standard. (x) Siloxanes formed by reaction of some remaining diphenylsilane with water.



4. Reaction of methyl 5-hexenoate with  $\text{Et}_3\text{SiH}$  and  $\text{Ph}_2\text{SiH}_2$  using  $[\text{Rh}(\text{SiSiBu})]$  as catalyst.

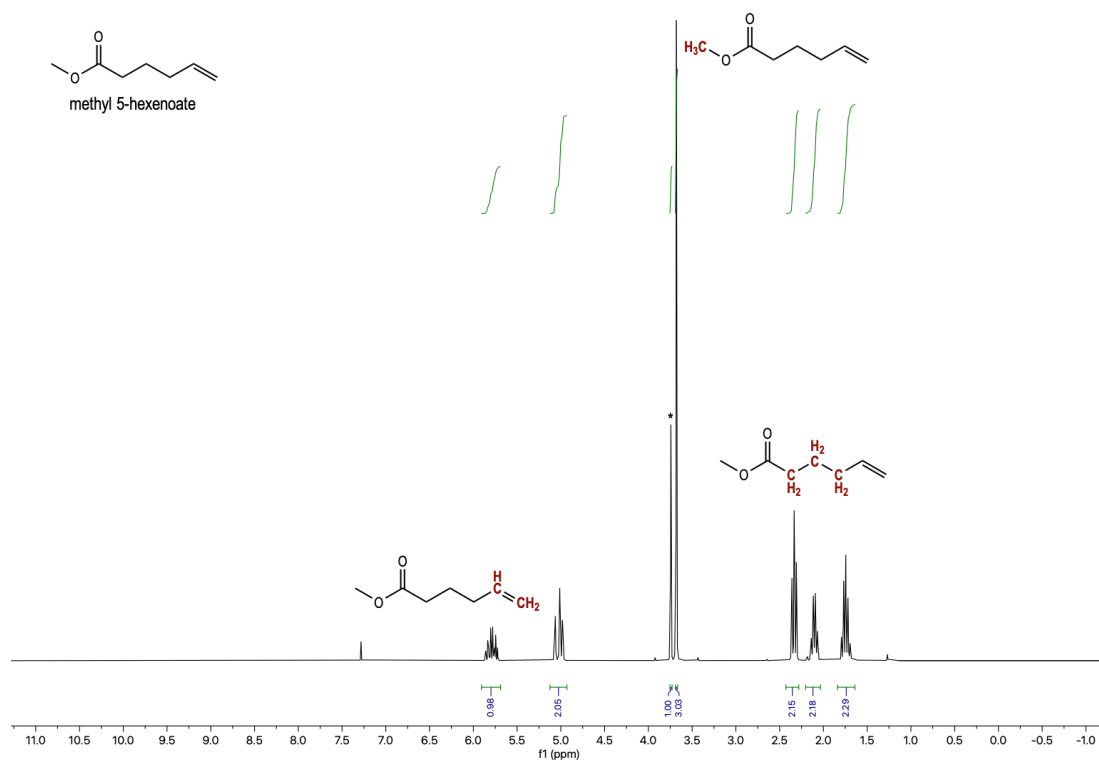

Figure S.13.  $^1\text{H}$  NMR ( $\text{CDCl}_3$ , 298 K) spectrum of methyl 5-hexenoate. (\*) 1,2-dichloroethane (0.25 equivalents) as internal standard.

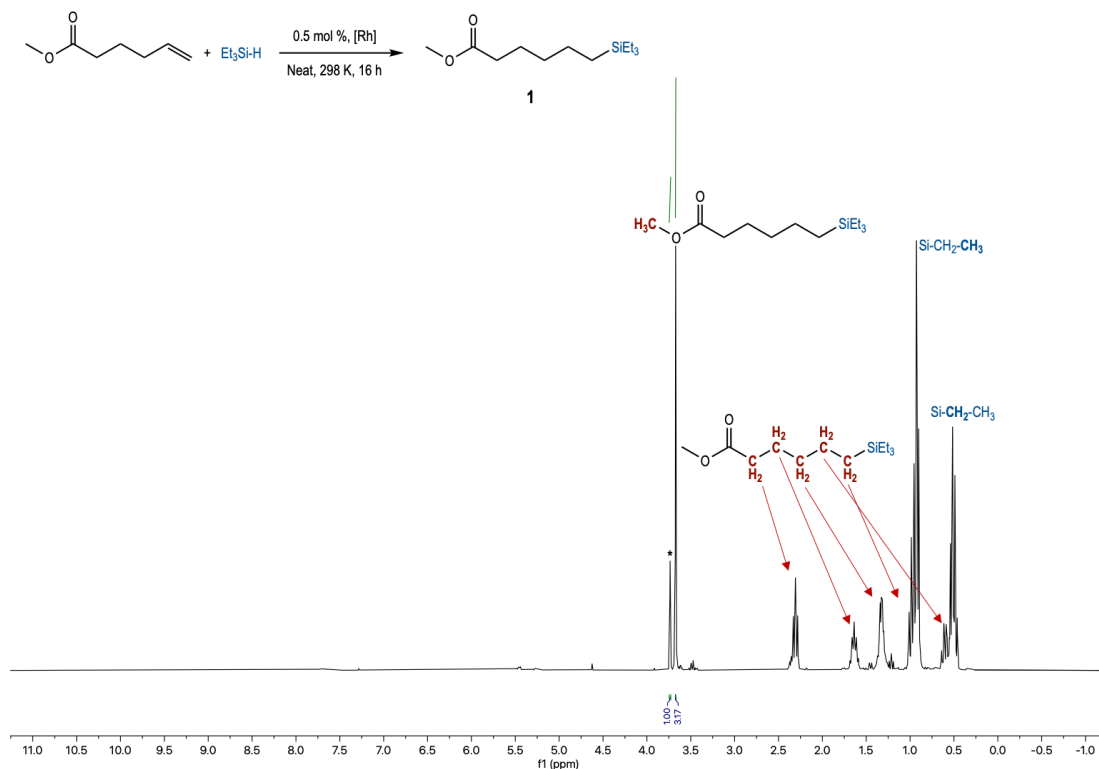

Figure S.14.  $^1\text{H}$  NMR ( $\text{CDCl}_3$ , 298 K) spectrum of the crude reaction mixture after 16 hours. (\*) 1,2-dichloroethane (0.25 equivalents) as internal standard.

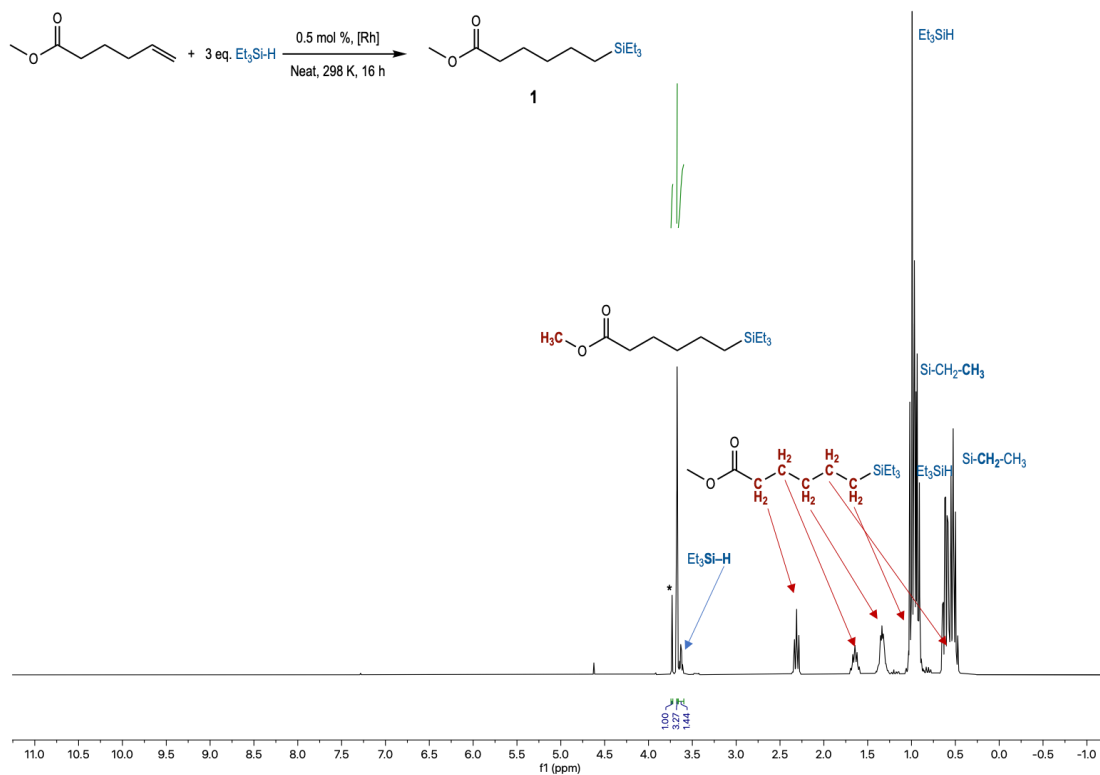

**Figure S.15.**  $^1\text{H NMR}$  ( $\text{CDCl}_3$ , 298 K) spectrum of the crude reaction mixture after 16 hours. (\*) 1,2-dichloroethane (0.25 equivalents) as internal standard.

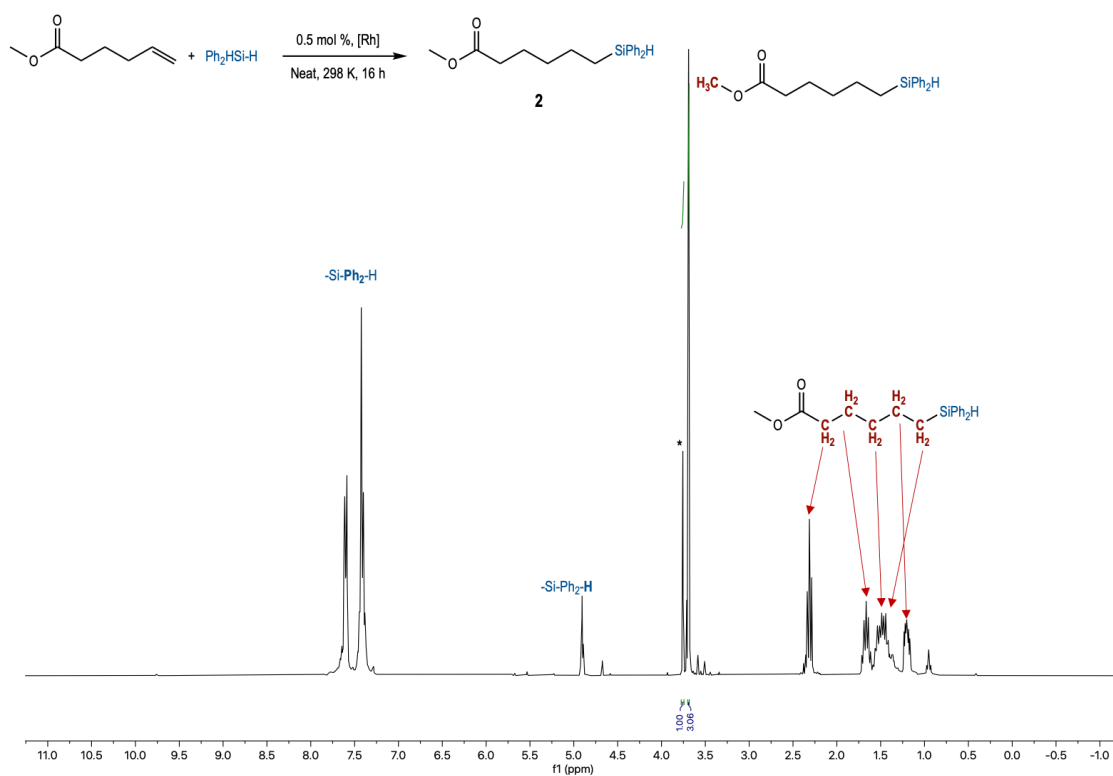

**Figure S.16.**  $^1\text{H NMR}$  ( $\text{CDCl}_3$ , 298 K) spectrum of the crude reaction mixture after 16 hours. (\*) 1,2-dichloroethane (0.25 equivalents) as internal standard.

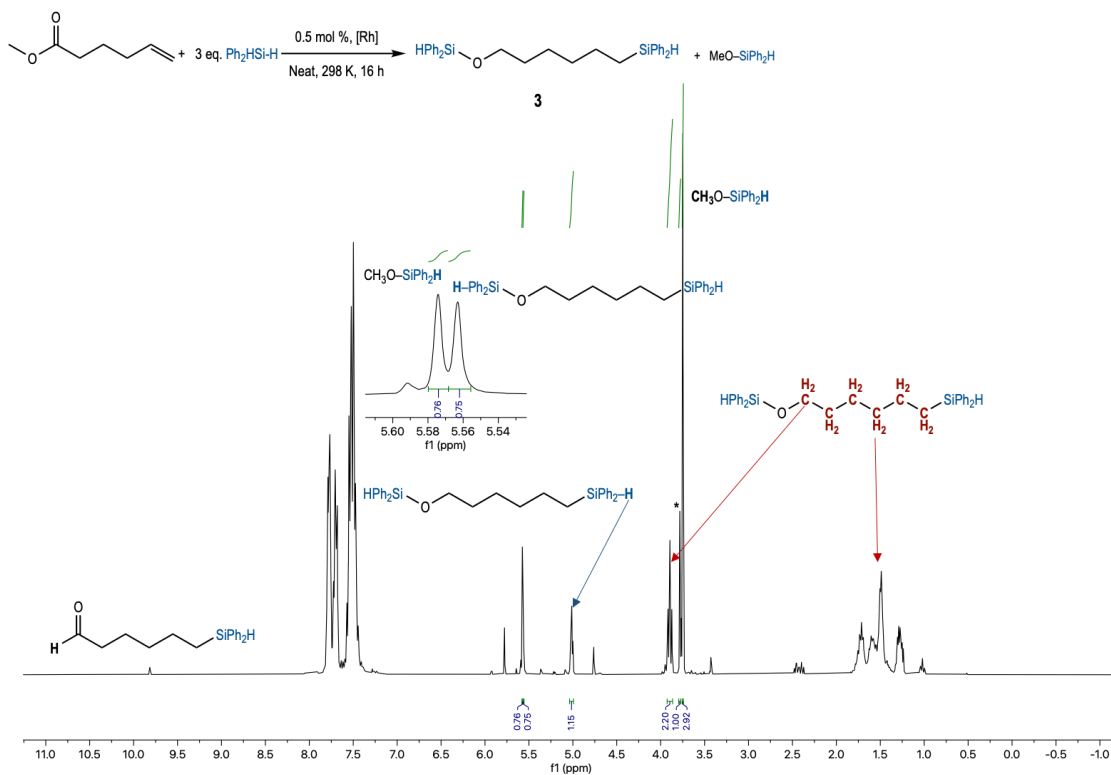

Figure S.17.  $^1\text{H NMR (CDCl}_3, 298 \text{ K)}$  spectrum of the crude reaction mixture after 16 hours. (\*) 1,2-dichloroethane (0.25 equivalents) as internal standard.

## 5. Reaction of ethyl oleate with $\text{Et}_3\text{SiH}$ and $\text{Ph}_2\text{SiH}_2$ using $[\text{Rh}(\text{SiSiBu})]$ as catalyst.

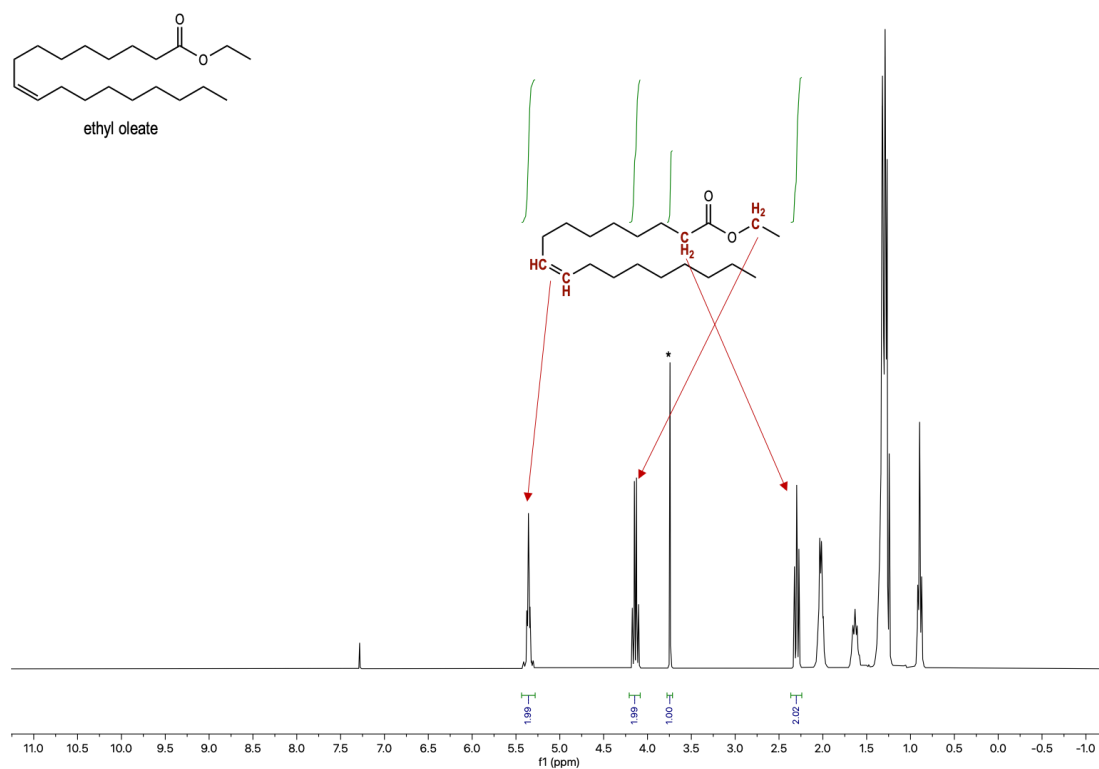

Figure S.18.  $^1\text{H NMR (CDCl}_3, 298 \text{ K)}$  spectrum of ethyl oleate. (\*) 1,2-dichloroethane (0.25 equivalents) as internal standard.

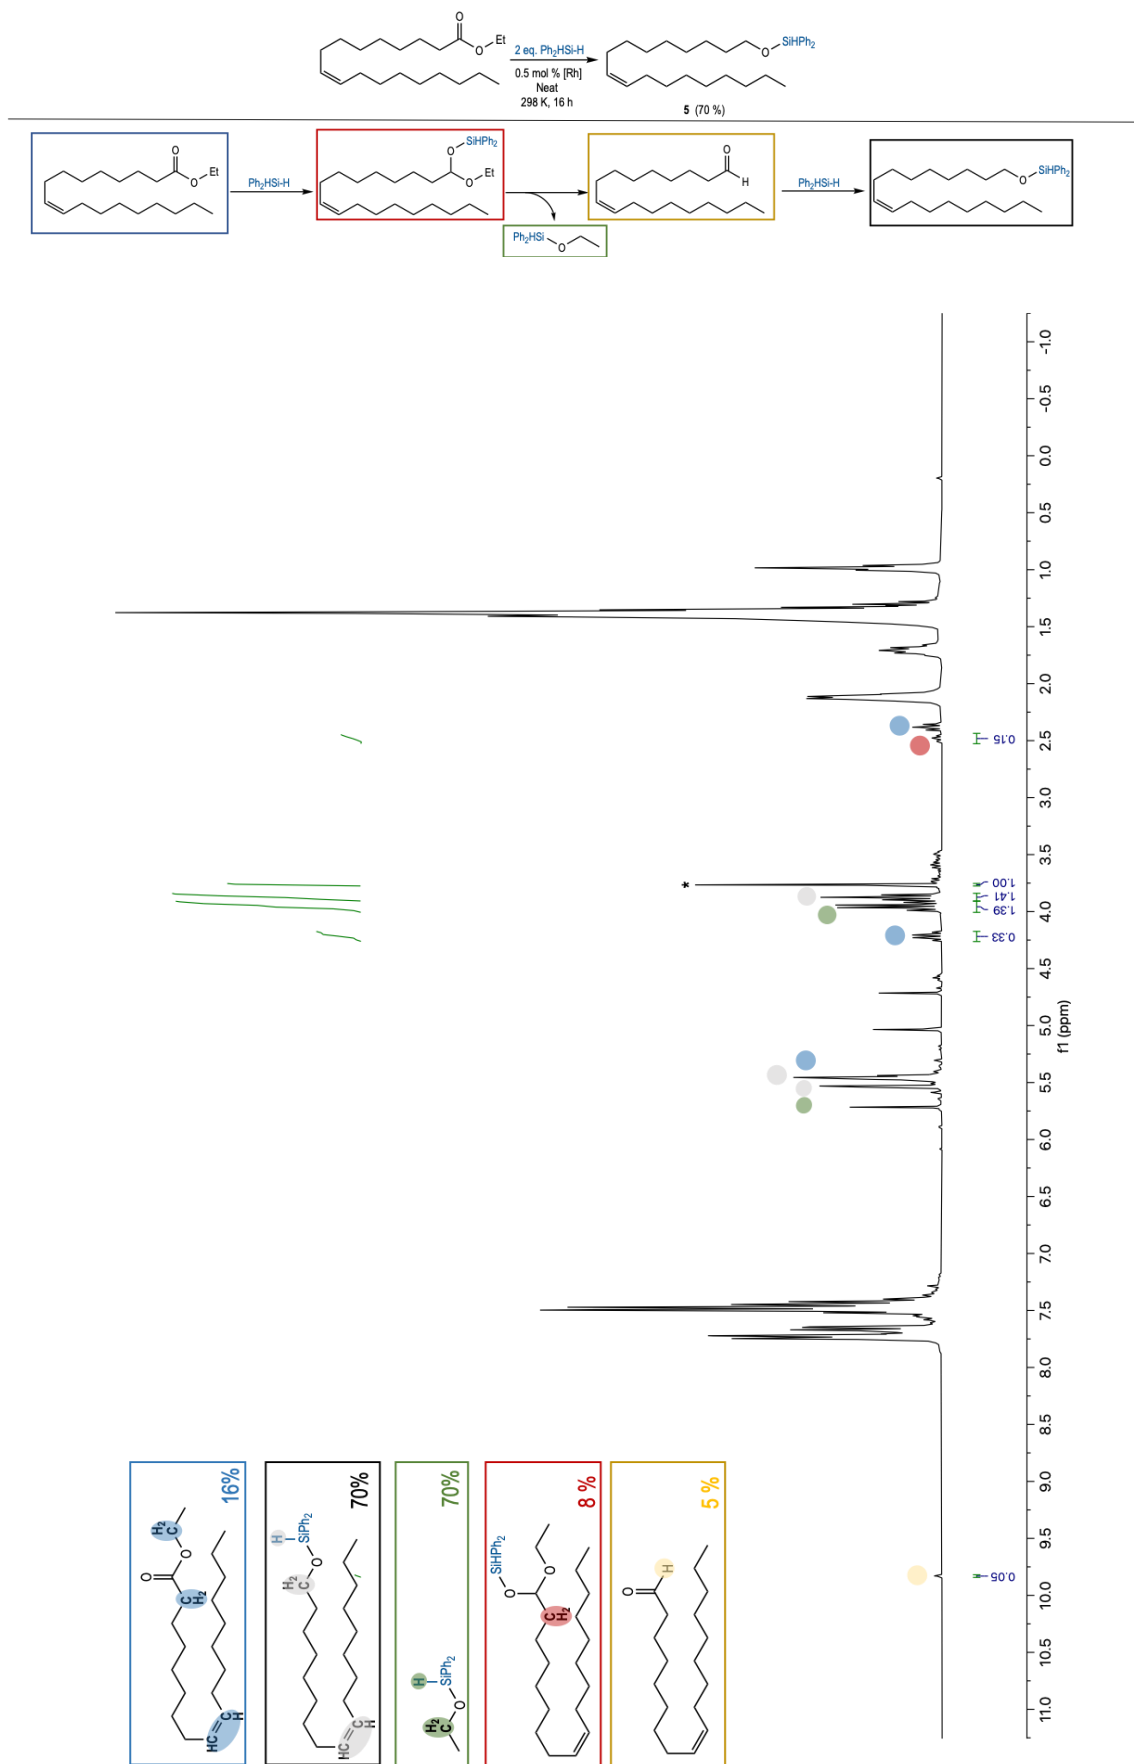

**Figure S.19.** <sup>1</sup>H NMR (CDCl<sub>3</sub>, 298 K) spectrum of the crude reaction mixture after 16 hours. (\*) 1,2-dichloroethane (0.25 equivalents) as internal standard.

## 6. Reaction of olive oil with $\text{Ph}_2\text{SiH}_2$ using $[\text{Rh}(\text{SiSi}^i\text{Bu})]$ as catalyst.

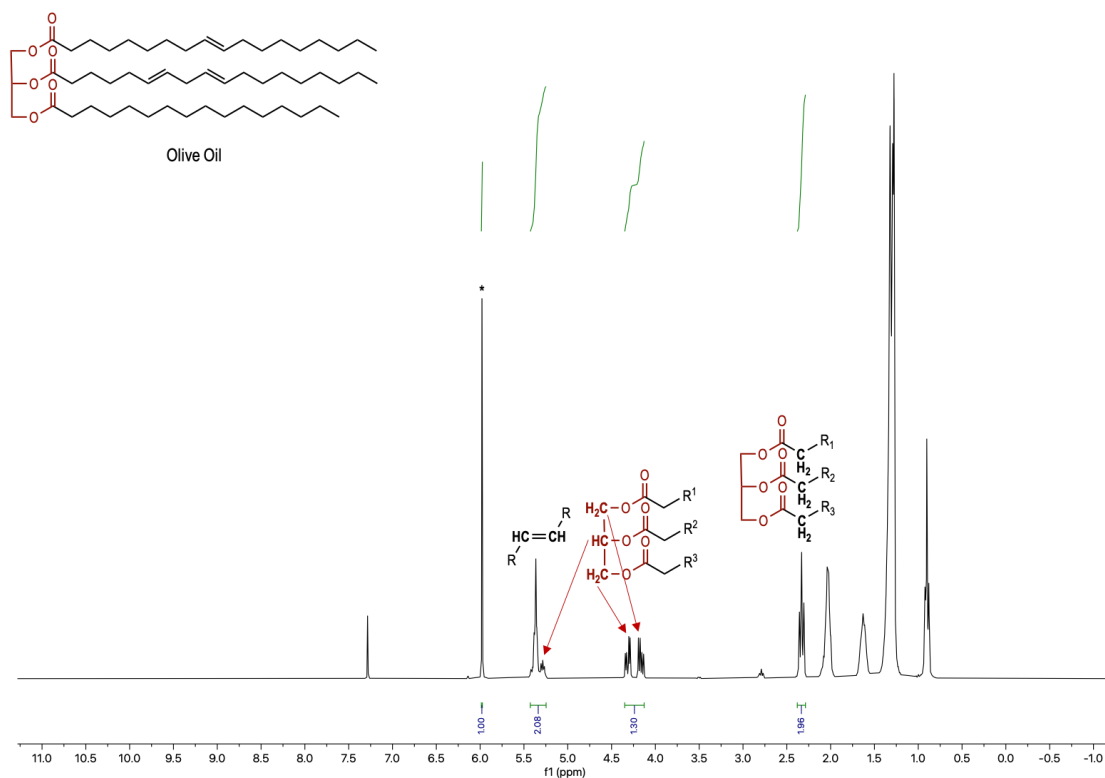

**Figure S.20.**  $^1\text{H}$  NMR ( $\text{CDCl}_3$ , 298 K) spectrum of olive oil. (\*) tetrachloroethane (0.5 equivalents by fatty ester chain) as internal standard.

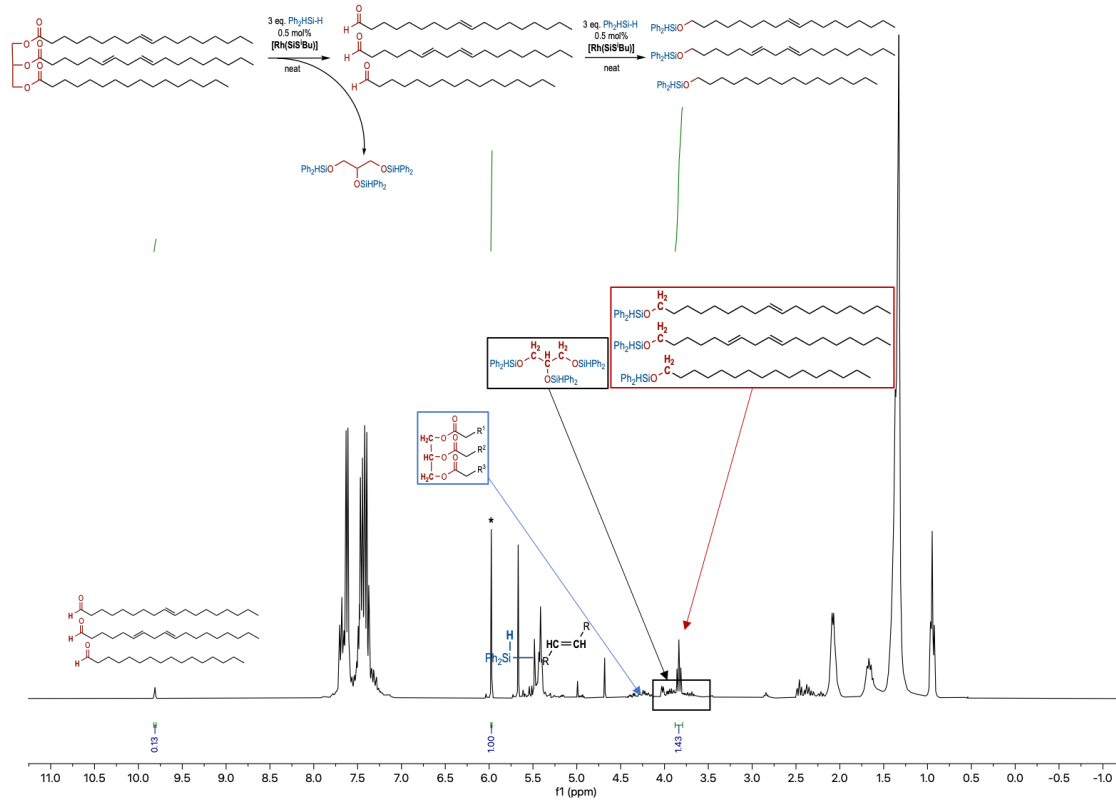

**Figure S.21.**  $^1\text{H}$  NMR ( $\text{CDCl}_3$ , 298 K) spectrum of the crude reaction mixture after 16 hours. (\*) tetrachloroethane (0.5 equivalents by fatty ester chain) as internal standard.

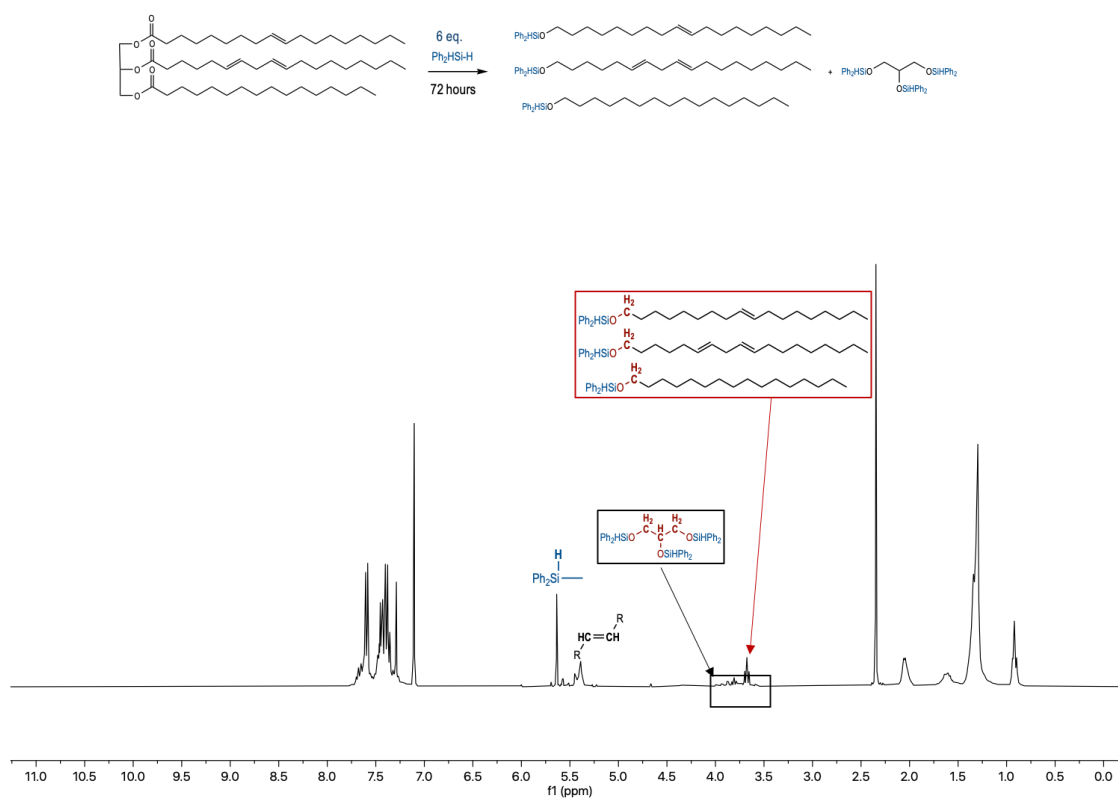

Figure S.22.  $^1\text{H NMR}$  ( $\text{CDCl}_3$ , 298 K) spectrum of the crude reaction mixture after 72 hours.

### **- Hydrolysis of silyl ethers: Synthesis of fatty alcohols**

Hydrolysis of the silyl ethers was carried out using an excess of NaOH (100 mg NaOH per 100 mg reaction mixture) in a 1:1 mixture of MeOH: $\text{CH}_2\text{Cl}_2$  (1mL:1mL). After one hour, the solvents were removed, the reaction crude redissolved in  $\text{CHCl}_3$  (10 mL) and washed with water (3 x 10 mL). The organic layer was dried with  $\text{MgSO}_4$  and evaporated to obtain the fatty alcohols.

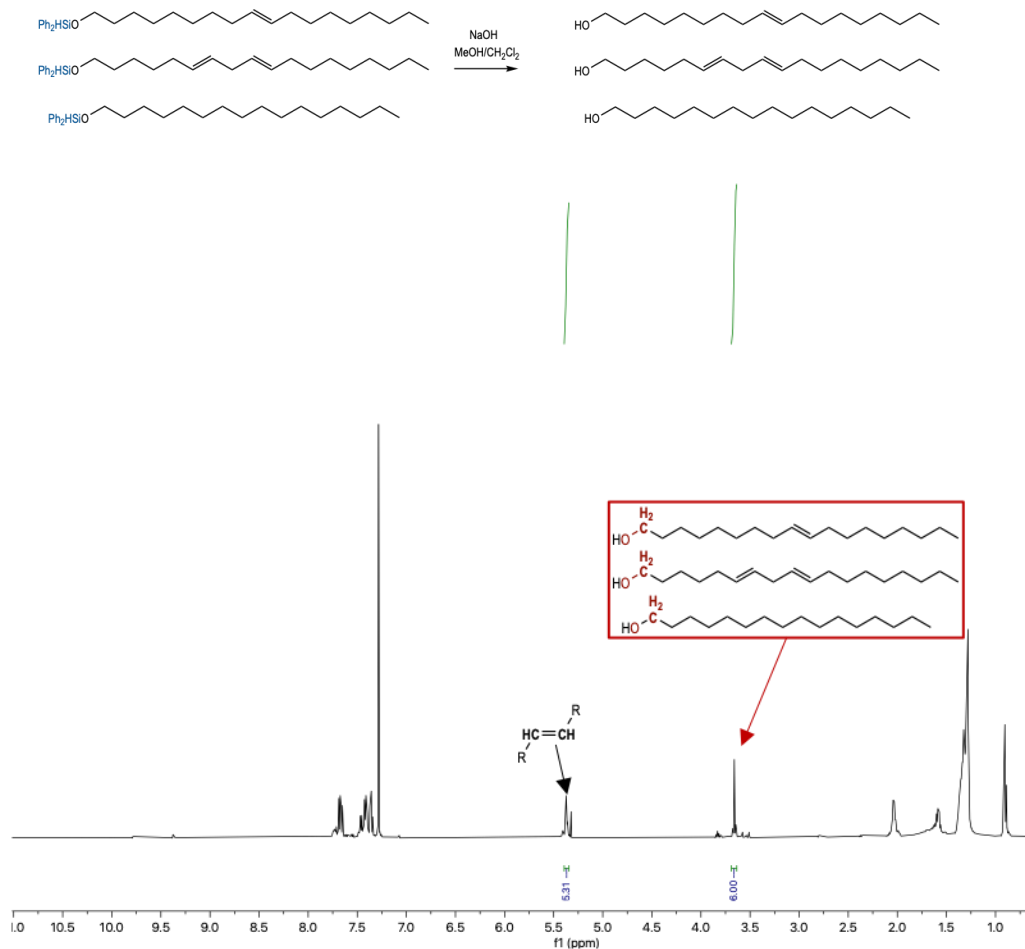

**Figure S.23.** <sup>1</sup>H NMR (CDCl<sub>3</sub>, 298 K) spectrum of the crude reaction mixture (reduction of olive oil) after 72 hours and after hydrolysis reaction (1h).

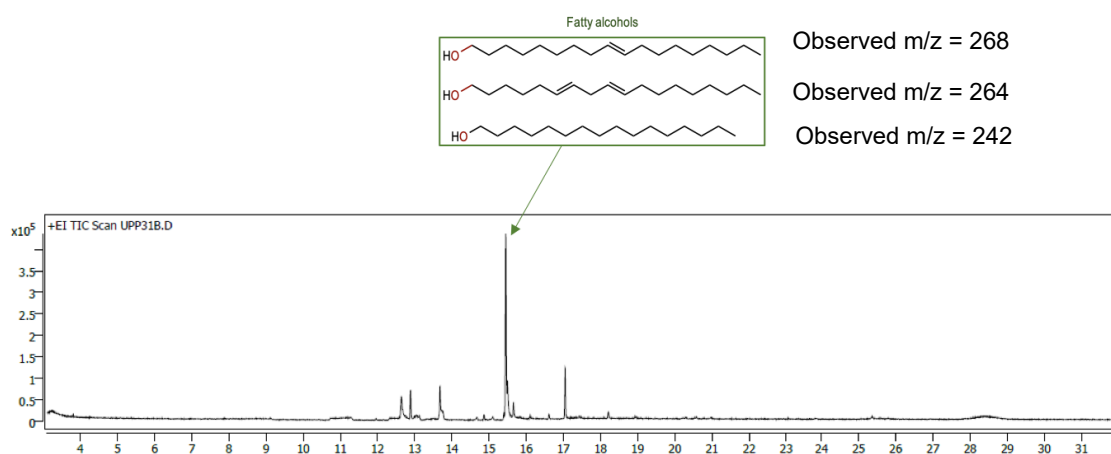

**Figure S.24.** GC-MS of hydrolysis reaction.

7. Reaction of other plant oils with Ph<sub>2</sub>SiH<sub>2</sub> using [Rh(SiSiBu)] as catalyst.  
**- Coconut Oil**

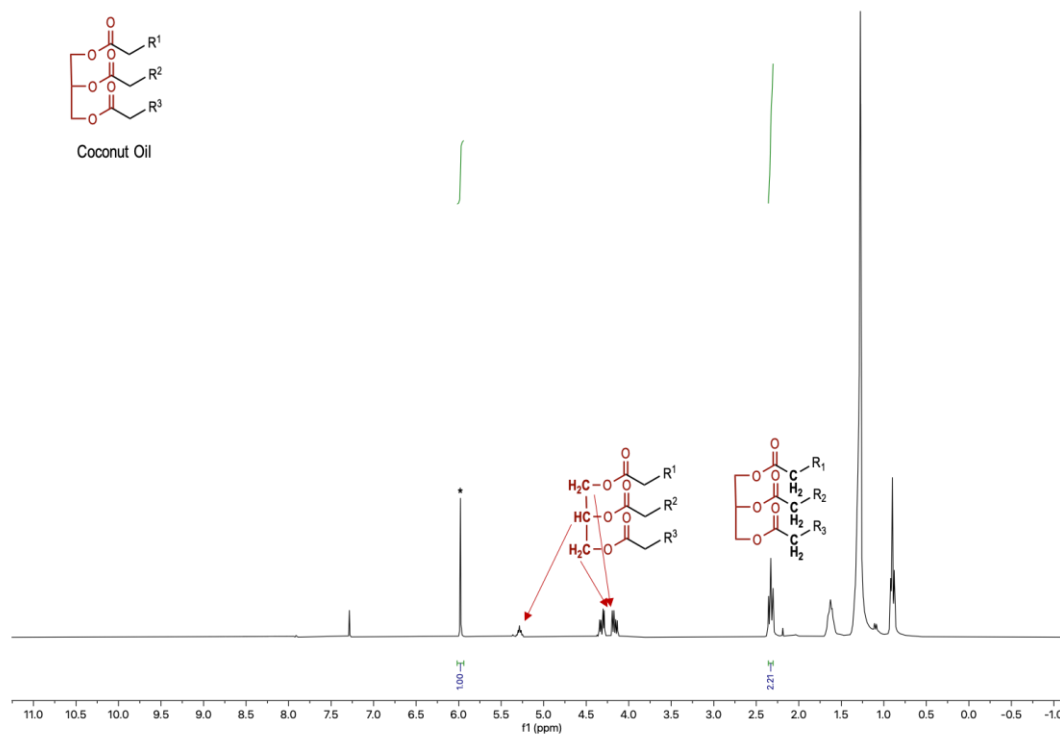

Figure S.25. <sup>1</sup>H NMR (CDCl<sub>3</sub>, 298 K) spectrum of coconut oil. (\*) tetrachloroethane (0.5 equivalents by fatty ester chain) as internal standard.

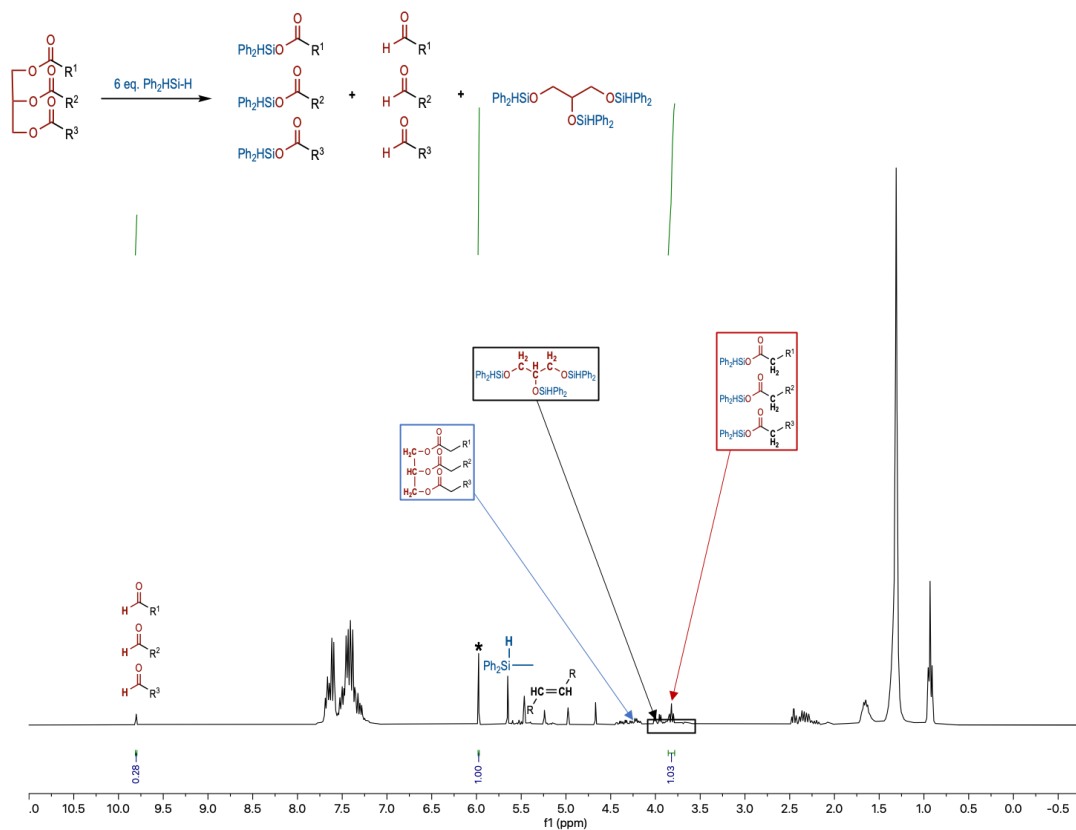



**Figure S.26.**  $^1\text{H}$  NMR ( $\text{CDCl}_3$ , 298 K) spectrum of the crude reaction mixture after 16 hours of reaction of coconut oil with diphenylsilane. (\*) tetrachloroethane (0.5 equivalents by fatty ester chain) as an internal standard.

**- Castor Oil**

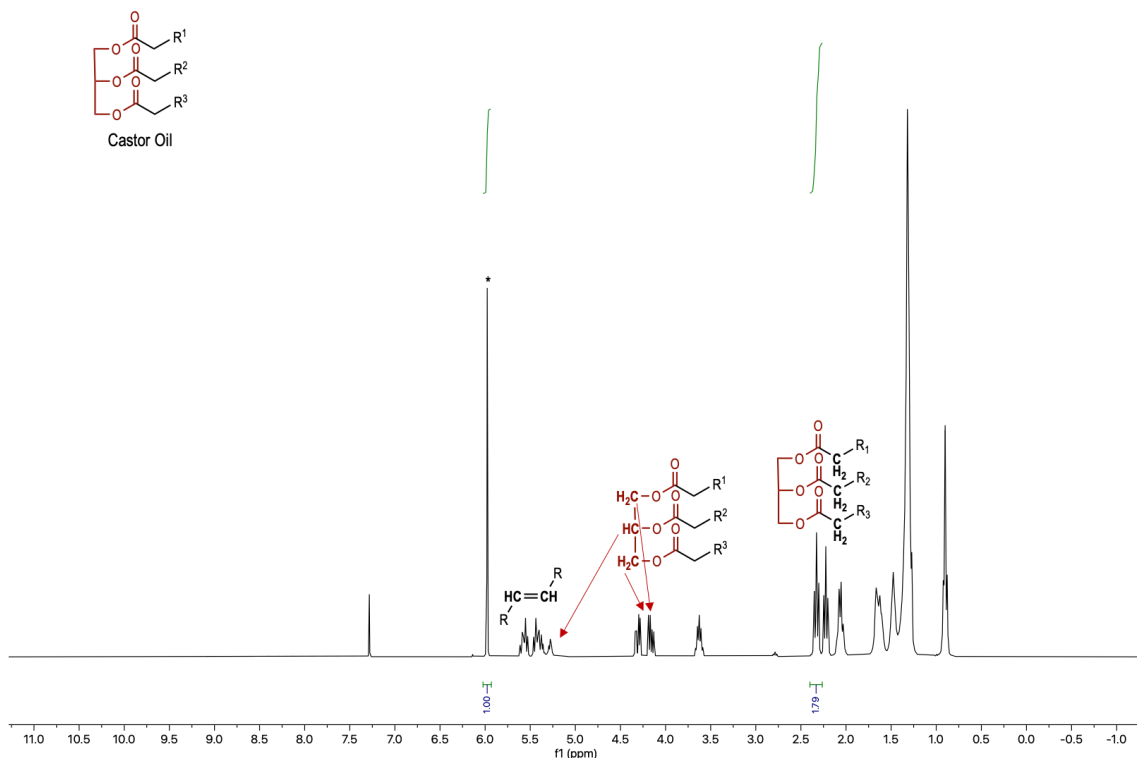

**Figure S.27.**  $^1\text{H}$  NMR ( $\text{CDCl}_3$ , 298 K) spectrum of castor oil. (\*) tetrachloroethane (0.5 equivalents by fatty ester chain) as internal standard.

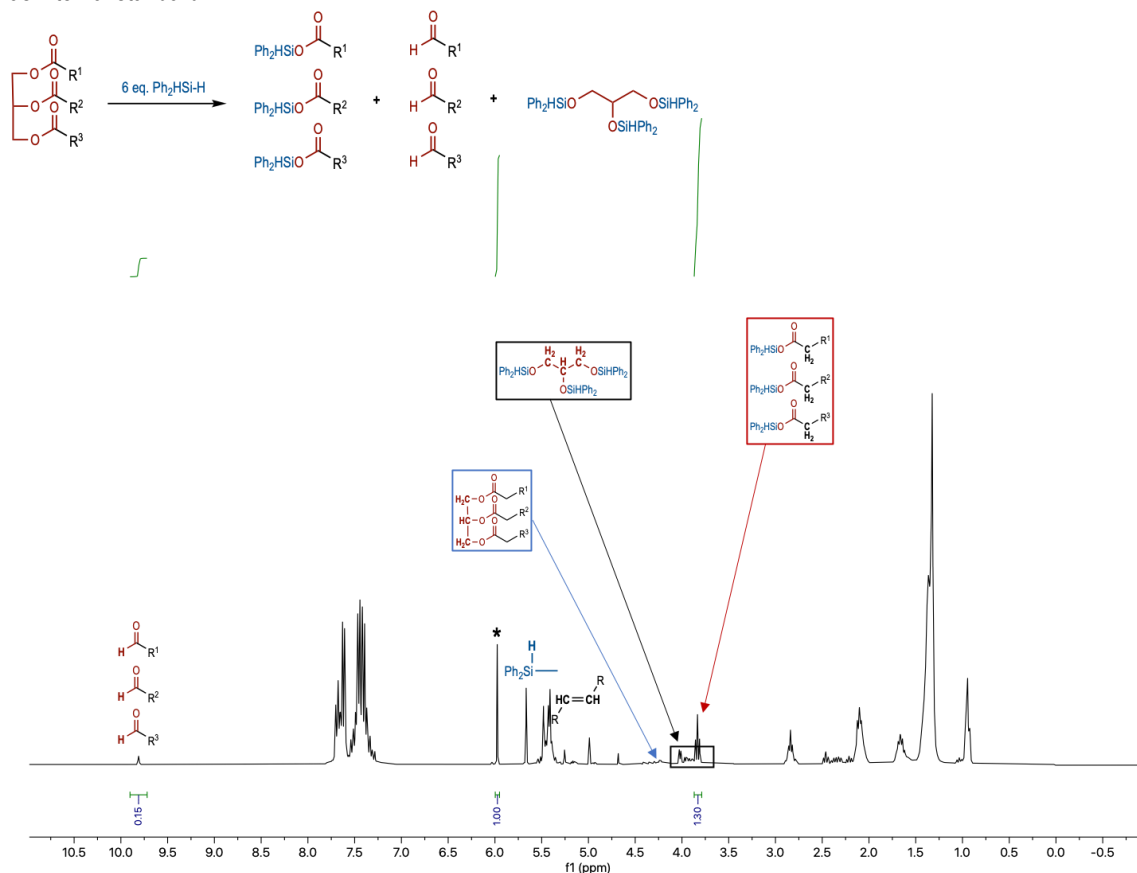

**Figure S.28.**  $^1\text{H}$  NMR ( $\text{CDCl}_3$ , 298 K) spectrum of the crude reaction mixture after 16 hours of reaction of castor oil with diphenylsilane. (\*) tetrachloroethane (0.5 equivalents by fatty ester chain) as an internal standard.

### - Sesame Oil

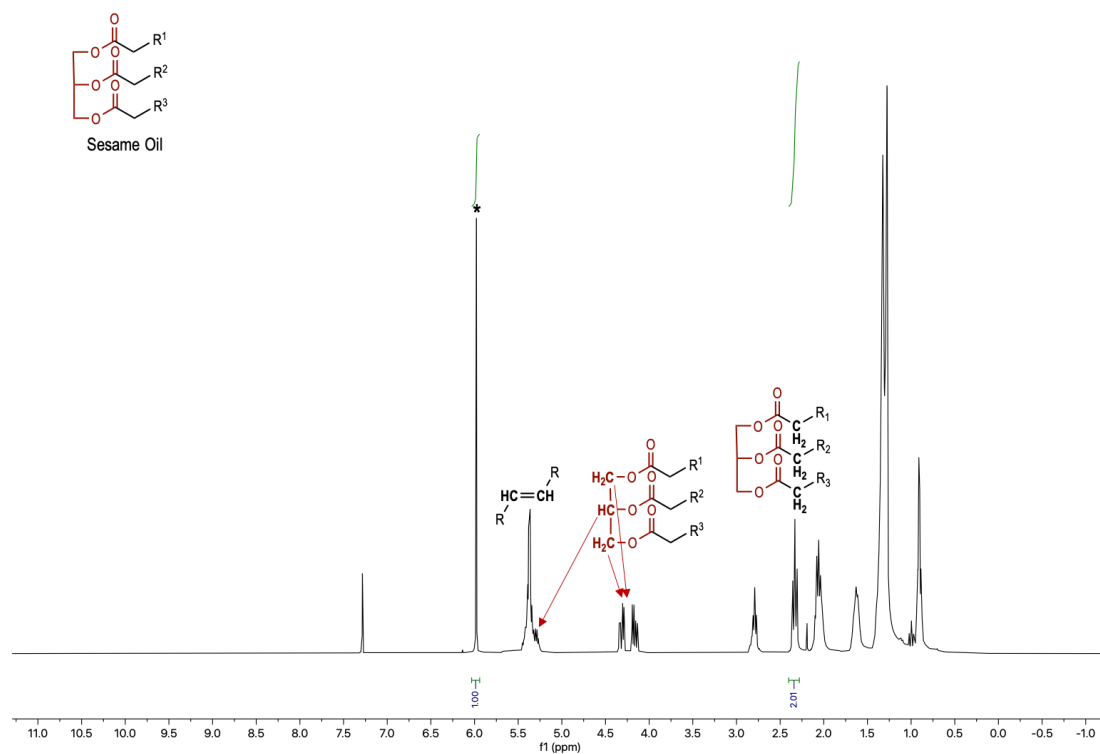

**Figure S.29.**  $^1\text{H}$  NMR ( $\text{CDCl}_3$ , 298 K) spectrum of sesame oil. (\*) tetrachloroethane (0.5 equivalents by fatty ester chain) as internal standard.

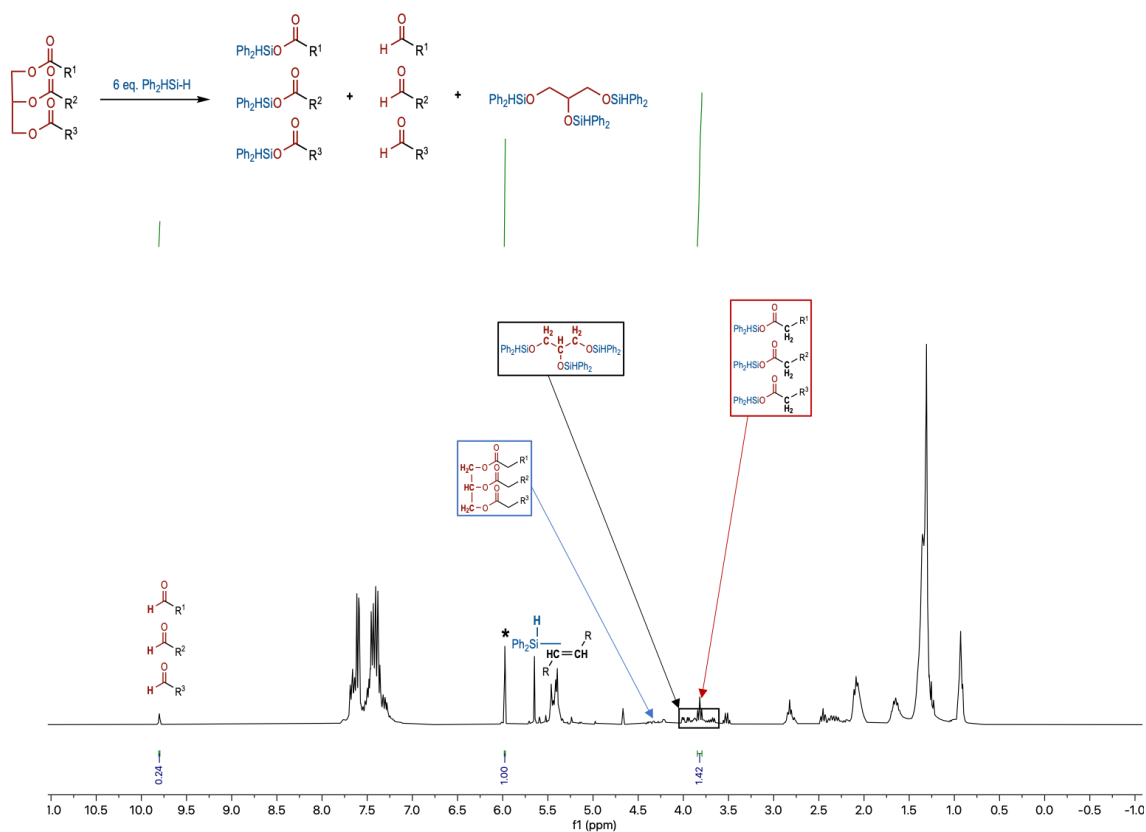

**Figure S.30.** <sup>1</sup>H NMR (CDCl<sub>3</sub>, 298 K) spectrum of the crude reaction mixture after 16 hours of reaction of sesame oil with diphenylsilane. (\*) tetrachloroethane (0.5 equivalents by fatty ester chain) as an internal standard.

### - Sunflower Oil

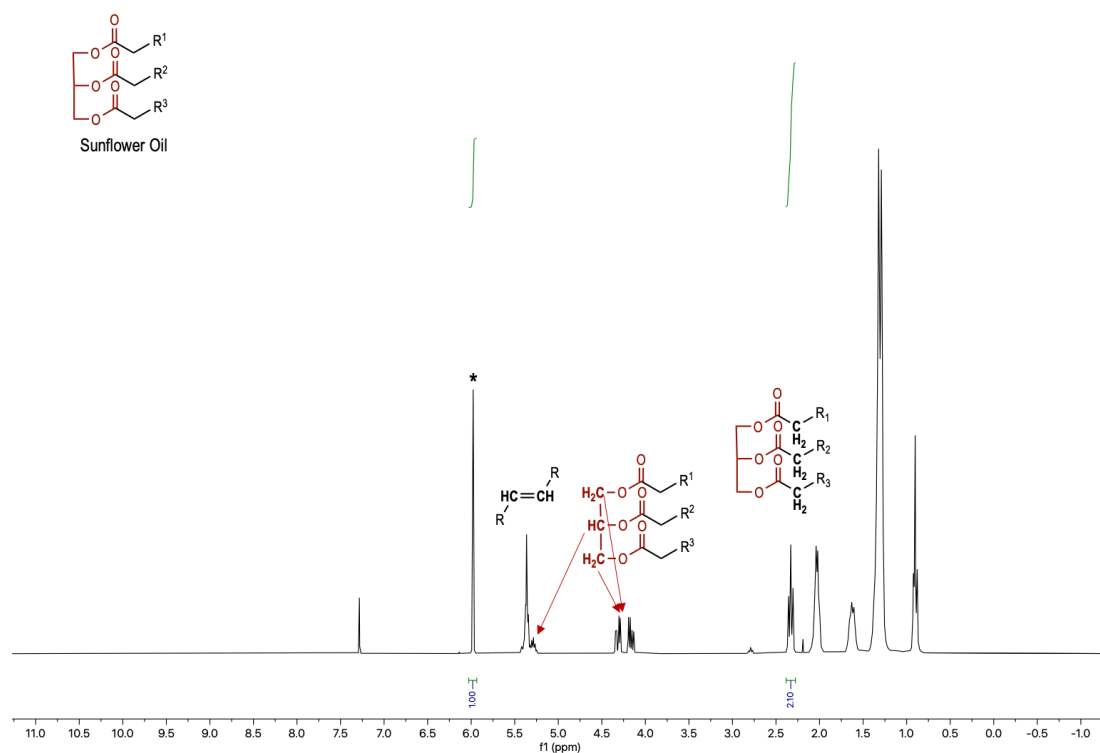

**Figure S.31.** <sup>1</sup>H NMR (CDCl<sub>3</sub>, 298 K) spectrum of sunflower oil. (\*) tetrachloroethane (0.5 equivalents by fatty ester chain) as internal standard.

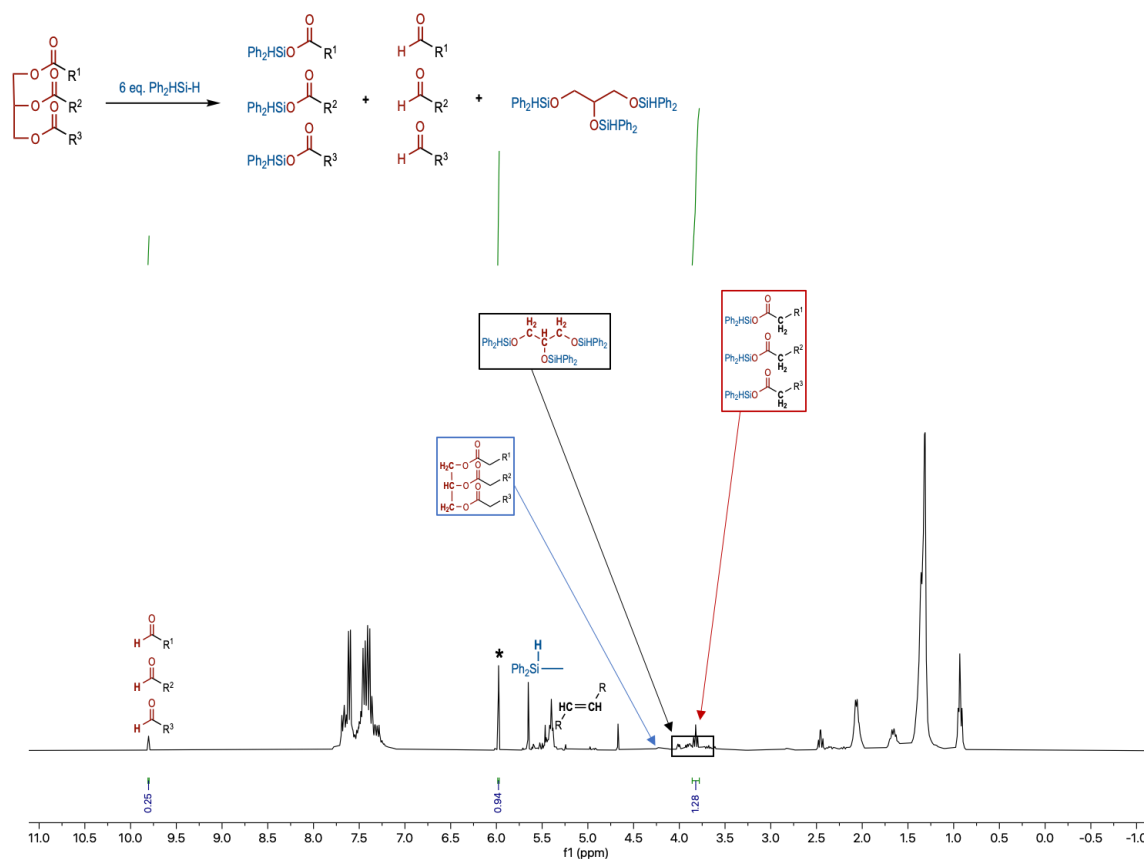

**Figure S.32.**  $^1\text{H}$  NMR ( $\text{CDCl}_3$ , 298 K) spectrum of the crude reaction mixture after 16 hours of reaction of sunflower oil with diphenylsilane. (\*) tetrachloroethane (0.5 equivalents by fatty ester chain) as an internal standard.

**Attempt of the recovery of the rhodium complex:** The reduction of olive oil was conducted as per the method described in Table 2, entry 1. After 24 hours of reaction, 1 mL of hexane was added to the reaction mixture, ultrasonicated, centrifuged and the liquid was separated from a deposited solid. It was presumed that the yellow colored liquid obtained upon centrifuge contained catalyst. However, its re-use as a catalyst in the further reduction of olive oil did not lead to the formation on any fatty alcohols.

## 8. References

1. U. Prieto, S. Azpeitia, E. San Sebastian, Z. Freixa, M. A. Garralda and M. A. Huertos, *ChemCatChem*, 2021, **13**, 1403
